# Supplementary material
Source: PubMed Central journal article supplement (PMC4383254)
Supplement: NIHMS659078-supplement-suppl_fig_2.pdf [file NIHMS659078-supplement-suppl_fig_2.pdf]

## Supplementary Figure 2: SUZ12 and H3K27me3 Immunohistochemistry.

From

**Somatic mutations of *SUZ12* in malignant peripheral nerve sheath tumors**

Ming Zhang, Yuxuan Wang, Sian Jones, Mark Sausen, Kevin McMahon, Rajni Sharma, Qing Wang, Allan J Belzberg, Kaisorn Chaichana, Gary L Gallia, Ziya L Gokaslan, Greg J Riggins, Jean-Paul Wolinsky, Laura D Wood, Elizabeth A Montgomery, Ralph H Hruban, Kenneth W Kinzler, Nickolas Papadopoulos, Bert Vogelstein & Chetan Bettegowda

*Nature Genetics* **46**, 1170–1172 (2014) doi:10.1038/ng.3116

Received 02 July 2014 Accepted 18 September 2014 Published online 12 October 2014

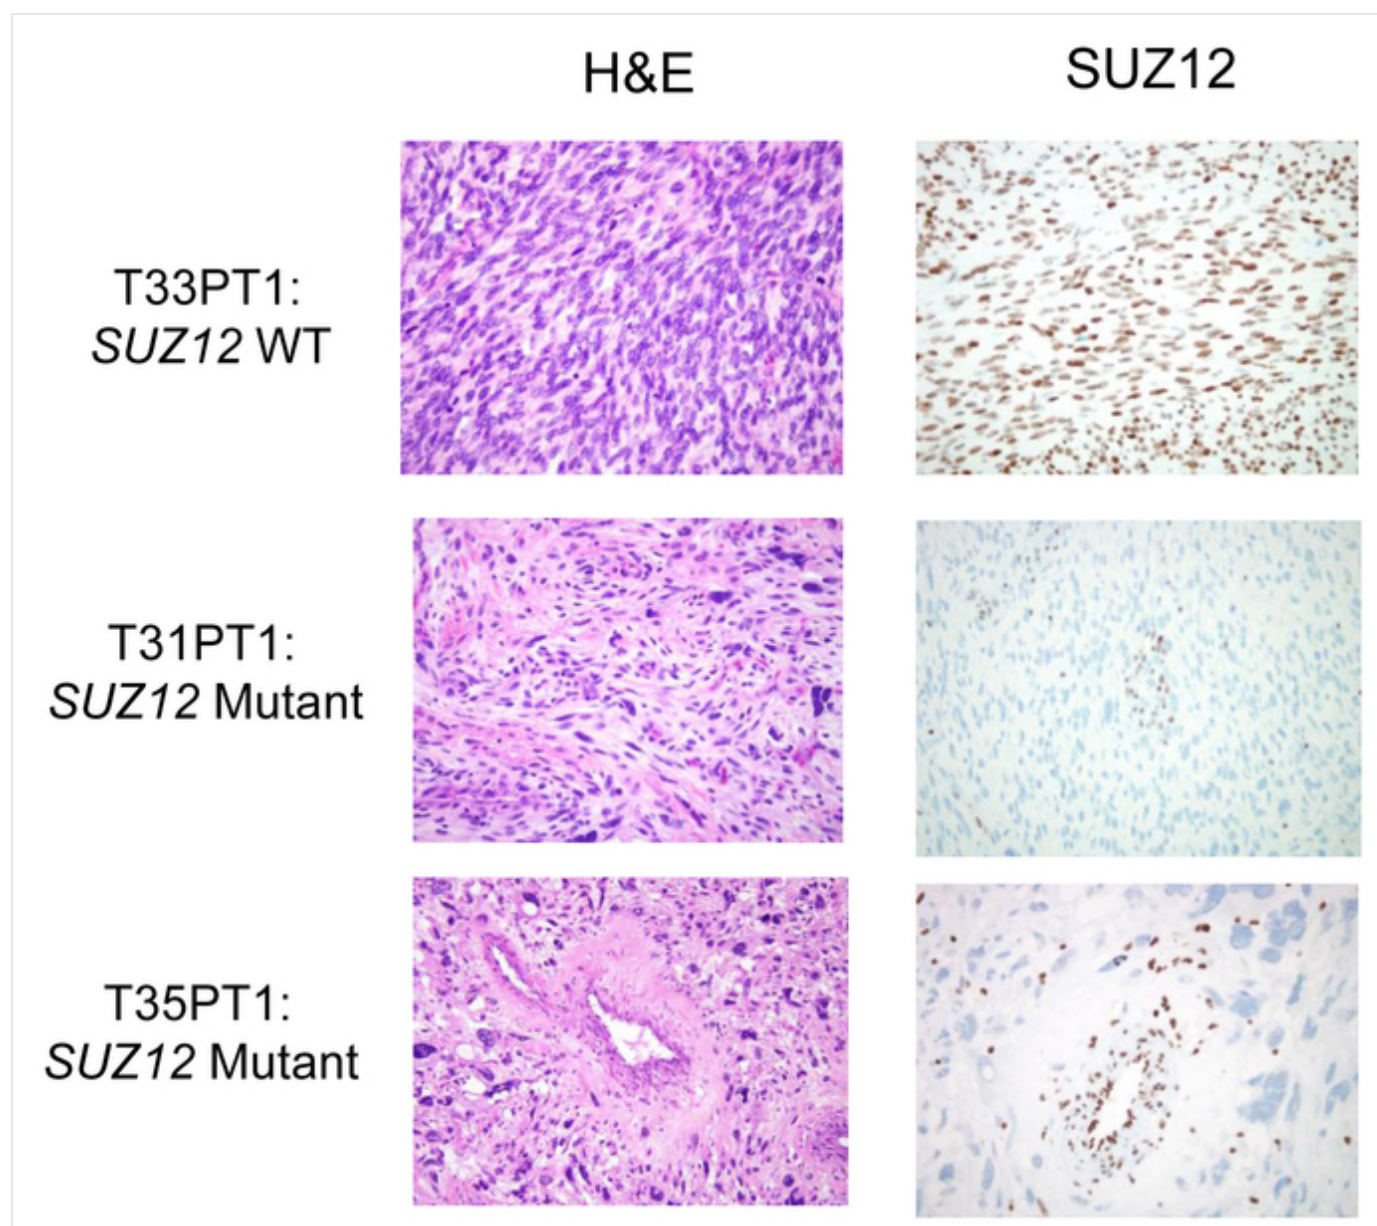

**T23PT1:  
SUZ12 Mutant**

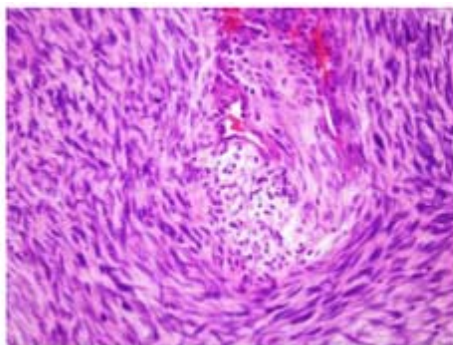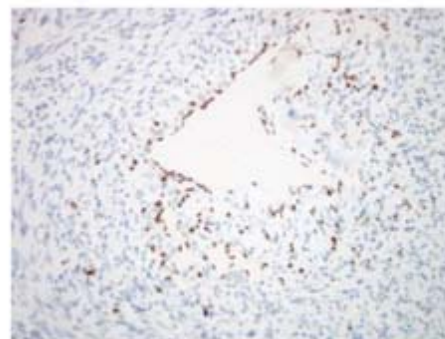

Representative H&E, SUZ12 and H3K27me3 immunohistochemistry results from MPNTs with and without *SUZ12* alterations. Each image is at 40x magnification and from a representative area of the tumor but not from identical locations given the scarcity of tissue.

**Nature Genetics** ISSN 1061-4036 EISSN 1546-1718

© 2014 Macmillan Publishers Limited. All Rights Reserved.

partner of AGORA, HINARI, OARE, INASP, ORCID, CrossRef and COUNTER
