# Supplementary material
Source: PubMed Central journal article supplement (PMC4383254)
Supplement: NIHMS659078-supplement-supple_fig_1.pdf [file NIHMS659078-supplement-supple_fig_1.pdf]

## Supplementary Figure 1: Circos plots.

From

### Somatic mutations of *SUZ12* in malignant peripheral nerve sheath tumors

Ming Zhang, Yuxuan Wang, Sian Jones, Mark Sausen, Kevin McMahon, Rajni Sharma, Qing Wang, Allan J Belzberg, Kaisorn Chaichana, Gary L Gallia, Ziya L Gokaslan, Greg J Riggins, Jean-Paul Wolinsky, Laura D Wood, Elizabeth A Montgomery, Ralph H Hruban, Kenneth W Kinzler, Nickolas Papadopoulos, Bert Vogelstein & Chetan Bettegowda

*Nature Genetics* **46**, 1170–1172 (2014) doi:10.1038/ng.3116

Received 02 July 2014 Accepted 18 September 2014 Published online 12 October 2014

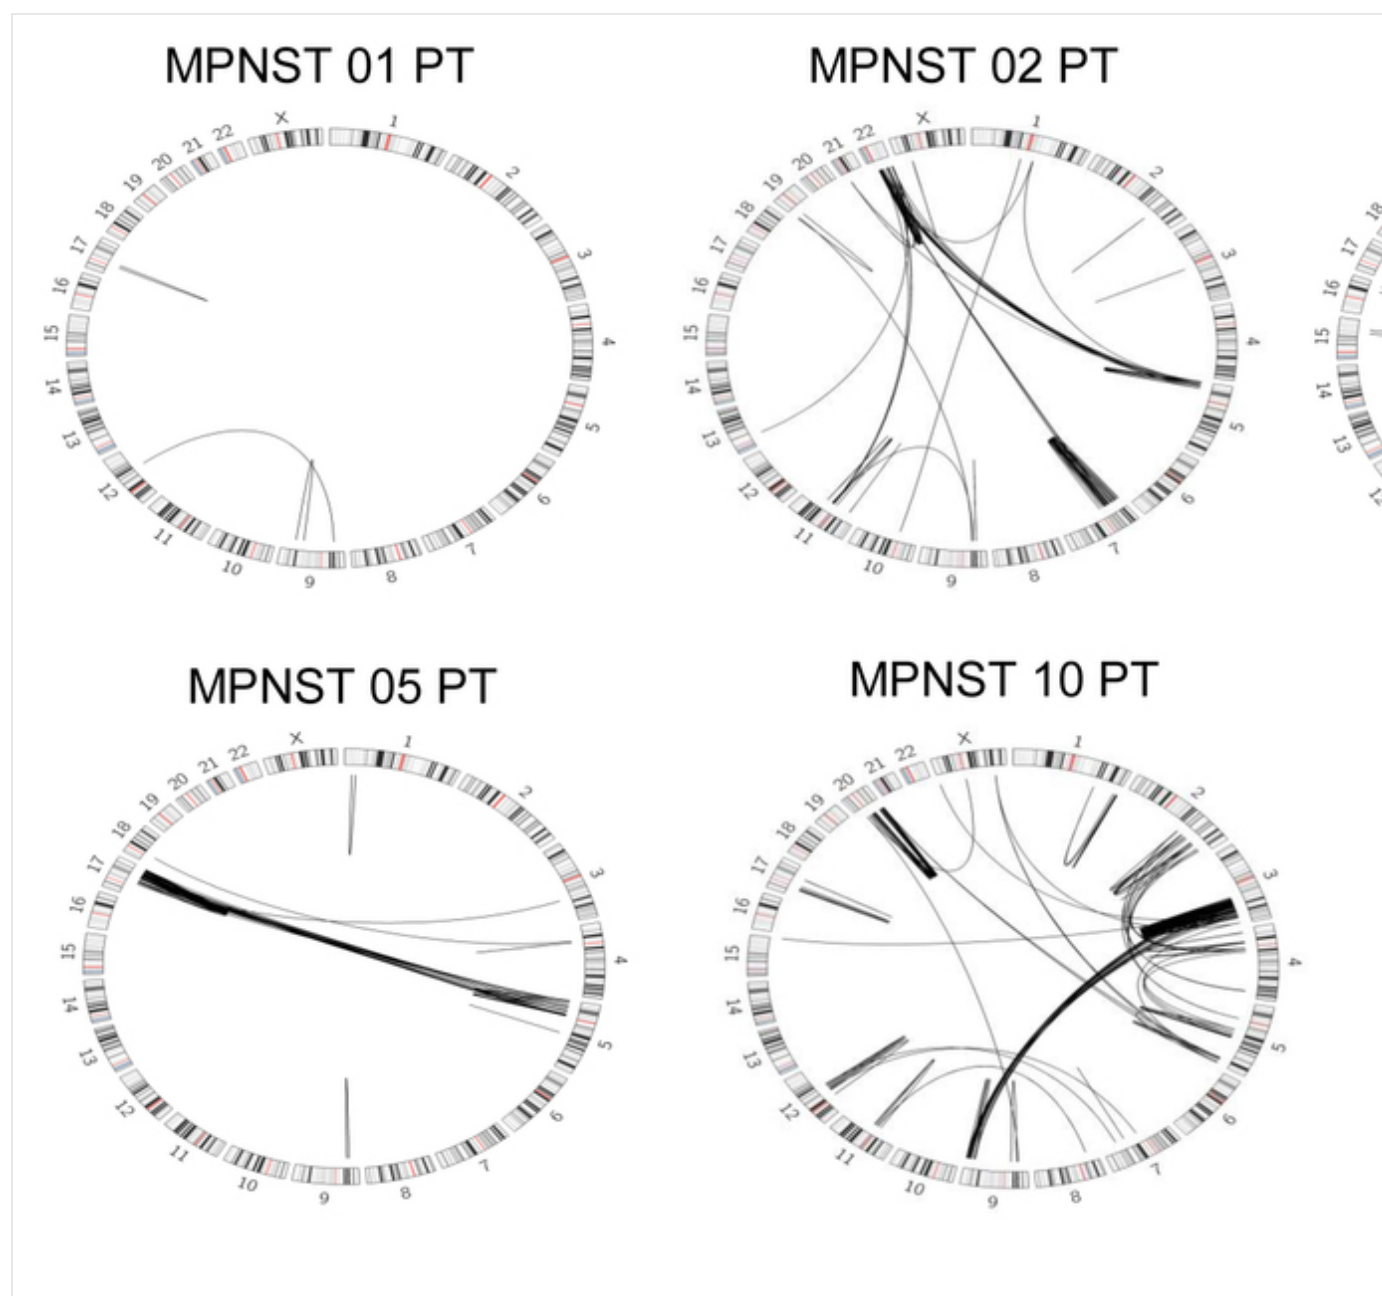

Circos plots representing structural alterations in MPNST tumors that were analyzed via whole-genome sequencing.

**Nature Genetics** ISSN 1061-4036 EISSN 1546-1718

© 2014 Macmillan Publishers Limited. All Rights Reserved.

partner of AGORA, HINARI, OARE, INASP, ORCID, CrossRef and COUNTER
